# Supplementary material for: A new virus found in garlic virus complex is a member of possible novel genus of the family Betaflexiviridae (order Tymovirales)
Source: PeerJ journal article supplement (doi:10.7717/peerj.6285), 2019-01-16
Supplement: FigureS3.pdf [file FigureS3.pdf]

**Betaflexiviridae**

- Carlavirus
- Foveavirus
- Robigovirus
- Vitivirus
- Chordovirus
- Prunevirus
- Citriovirus
- Trichovirus
- Divavirus
- Capillovirus
- Tepovirus
- Unassigned

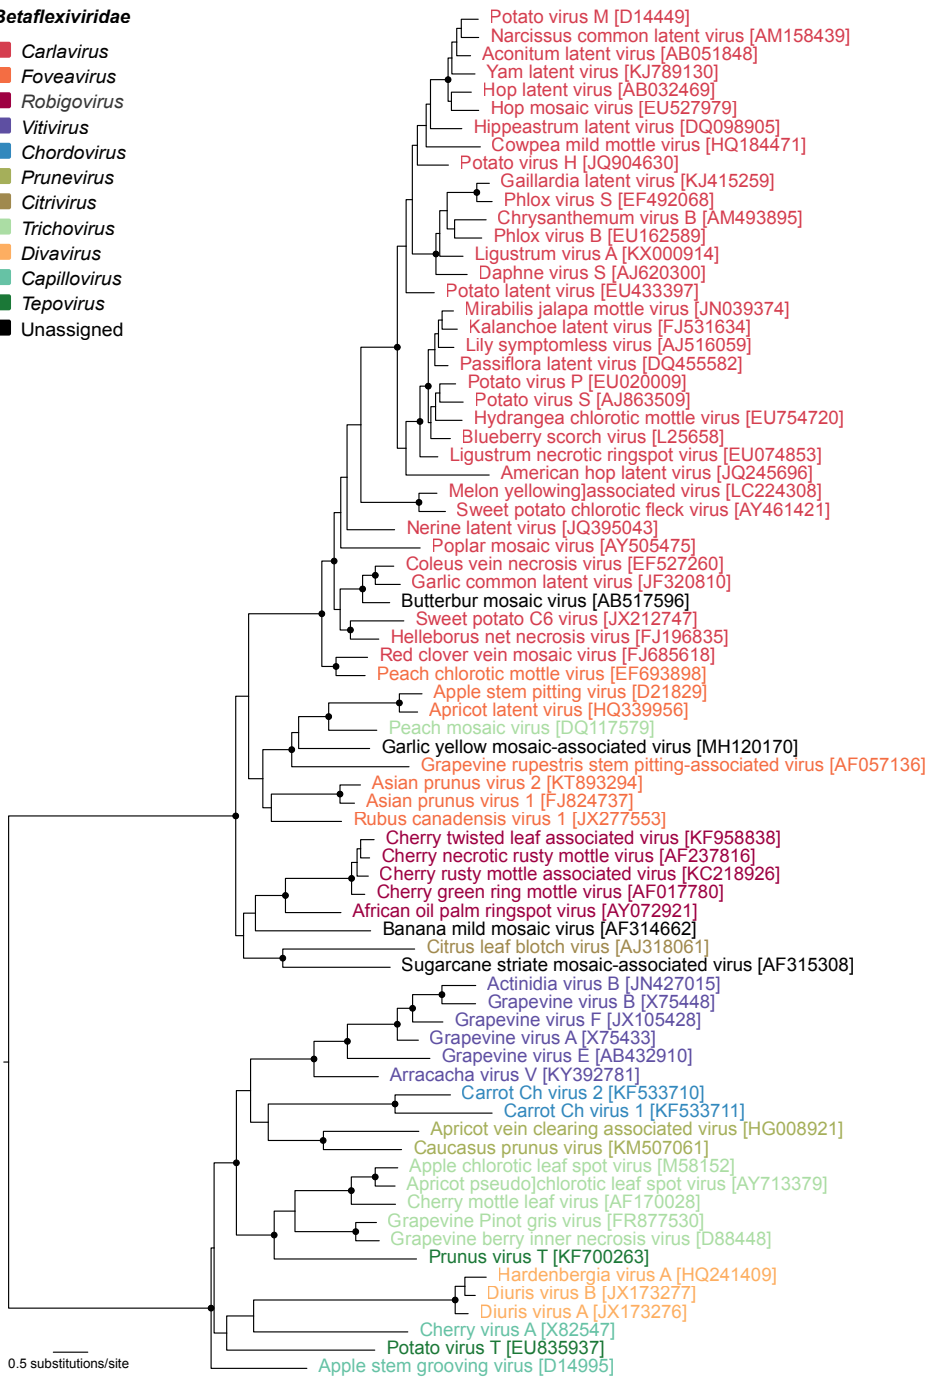

**Quinvirinae**

**Trivirinae**

0.5 substitutions/site
